# Supplementary material for: No Exchange of Picornaviruses in Vietnam between Humans and Animals in a High-Risk Cohort with Close Contact despite High Prevalence and Diversity
Source: MDPI journal article supplement (doi:10.3390/v13091709), 2021-08-27
Supplement: s1 [file s1]

**Table S1** Sequences found in VIZIONS study (in black) and related sequences (in grey) from Genbank

| Genus             | cluster           | virusname/Access.No | host.species                | country | year |
|-------------------|-------------------|---------------------|-----------------------------|---------|------|
| <i>Hunnivirus</i> | Hunnivirus Rat-C1 | 16715x9-74          | <i>Rattus argentiventer</i> | VietNam | 2014 |
| <i>Hunnivirus</i> | Hunnivirus Rat-C1 | 16715x17-77         | <i>Rattus argentiventer</i> | VietNam | 2014 |
| <i>Hunnivirus</i> | Hunnivirus Rat-C1 | KT944198.1          | <i>Bandicota indica</i>     | VietNam | 2012 |
| <i>Hunnivirus</i> | Hunnivirus Rat-C1 | 22084x8-856         | <i>Rattus argentiventer</i> | VietNam | 2014 |
| <i>Hunnivirus</i> | Hunnivirus Rat-C1 | KT944208.1          | <i>Rattus argentiventer</i> | VietNam | 2012 |
| <i>Hunnivirus</i> | Hunnivirus Rat-C1 | 22084x38-545        | <i>Rattus argentiventer</i> | VietNam | 2014 |
| <i>Hunnivirus</i> | Hunnivirus Rat-C1 | KT944209.1          | <i>Rattus argentiventer</i> | VietNam | 2012 |
| <i>Hunnivirus</i> | Hunnivirus Rat-C1 | 22084x13-215        | <i>Rattus argentiventer</i> | VietNam | 2014 |
| <i>Hunnivirus</i> | Hunnivirus Rat-C1 | 16715x33-264        | <i>Rattus argentiventer</i> | VietNam | 2014 |
| <i>Hunnivirus</i> | Hunnivirus Rat-C1 | KT944205.1          | <i>Rattus tanezumi</i>      | VietNam | 2012 |
| <i>Hunnivirus</i> | Hunnivirus Rat-C1 | 16715x25-289        | <i>Rattus argentiventer</i> | VietNam | 2014 |
| <i>Hunnivirus</i> | Hunnivirus Rat-C1 | 16715x41-103        | <i>Rattus argentiventer</i> | VietNam | 2014 |
| <i>Hunnivirus</i> | Hunnivirus Rat-C1 | 16715x49-624        | <i>Rattus argentiventer</i> | VietNam | 2014 |
| <i>Hunnivirus</i> | Hunnivirus Rat-C1 | 16715x73-28         | <i>Rattus argentiventer</i> | VietNam | 2014 |
| <i>Hunnivirus</i> | Hunnivirus Rat-C1 | 22084x6-4204        | <i>Rattus argentiventer</i> | VietNam | 2014 |
| <i>Hunnivirus</i> | Hunnivirus Rat-C1 | 22084x4-164         | <i>Rattus argentiventer</i> | VietNam | 2014 |
| <i>Hunnivirus</i> | Hunnivirus Rat-C1 | 16715x81-177        | <i>Rattus argentiventer</i> | VietNam | 2014 |
| <i>Hunnivirus</i> | Hunnivirus Rat-C1 | KT944202.1          | <i>Rattus argentiventer</i> | VietNam | 2012 |
| <i>Hunnivirus</i> | Hunnivirus Rat-C1 | 16715x89-10         | <i>Rattus argentiventer</i> | VietNam | 2014 |
| <i>Hunnivirus</i> | Hunnivirus Rat-C1 | 16715x25-288        | <i>Rattus argentiventer</i> | VietNam | 2014 |
| <i>Hunnivirus</i> | Hunnivirus Rat-C1 | KT944203.1          | <i>Rattus norvegicus</i>    | VietNam | 2012 |
| <i>Hunnivirus</i> | Hunnivirus Rat-C1 | KT944207.1          | <i>Rattus argentiventer</i> | VietNam | 2012 |
| <i>Hunnivirus</i> | Hunnivirus Rat-C1 | KT944214.1          | <i>Rattus tanezumi</i>      | VietNam | 2013 |
| <i>Hunnivirus</i> | Hunnivirus Rat-C1 | MF352430.1          | <i>Rattus tanezumi</i>      | China   | 2012 |
| <i>Hunnivirus</i> | Hunnivirus Rat-C2 | 16715x41-120        | <i>Rattus argentiventer</i> | VietNam | 2014 |
| <i>Hunnivirus</i> | Hunnivirus Rat-C2 | 16715x65-350        | <i>Rattus argentiventer</i> | VietNam | 2014 |
| <i>Hunnivirus</i> | Hunnivirus Rat-C2 | KT944204.1          | <i>Rattus argentiventer</i> | VietNam | 2013 |
| <i>Hunnivirus</i> | Hunnivirus Rat-C2 | 22084x6-5619        | <i>Rattus argentiventer</i> | VietNam | 2014 |
| <i>Hunnivirus</i> | Hunnivirus Rat-C2 | 22084x22-123        | <i>Rattus argentiventer</i> | VietNam | 2014 |
| <i>Hunnivirus</i> | Hunnivirus Rat-C2 | KT944212.1          | <i>Rattus argentiventer</i> | VietNam | 2012 |
| <i>Hunnivirus</i> | Hunnivirus Rat-C2 | 22057x58-10         | <i>Rattus argentiventer</i> | VietNam | 2014 |
| <i>Hunnivirus</i> | Hunnivirus Rat-C2 | 16715x33-233        | <i>Rattus argentiventer</i> | VietNam | 2014 |
| <i>Hunnivirus</i> | Hunnivirus Rat-C2 | 22056x78-1          | <i>Rattus argentiventer</i> | VietNam | 2014 |
| <i>Hunnivirus</i> | Hunnivirus Rat-C2 | KT944213.1          | <i>Rattus argentiventer</i> | VietNam | 2012 |
| <i>Hunnivirus</i> | Hunnivirus Rat-C2 | KT944206.1          | <i>Rattus argentiventer</i> | VietNam | 2012 |
| <i>Hunnivirus</i> | Hunnivirus Rat-C3 | 16715x57-54         | <i>Rattus argentiventer</i> | VietNam | 2014 |



|                     |                   |               |                               |         |      |
|---------------------|-------------------|---------------|-------------------------------|---------|------|
| <i>Hunnivirus</i>   | Hunnivirus Rat-C3 | 16715x89-9    | <i>Rattus argentiventer</i>   | VietNam | 2014 |
| <i>Hunnivirus</i>   | Hunnivirus Rat-C3 | 22084x7-3389  | <i>Rattus argentiventer</i>   | VietNam | 2014 |
| <i>Hunnivirus</i>   | Hunnivirus Rat-C3 | 22057x33-1    | <i>Rattus argentiventer</i>   | VietNam | 2014 |
| <i>Hunnivirus</i>   | Hunnivirus Rat-C3 | 22084x14-23   | <i>Rattus argentiventer</i>   | VietNam | 2014 |
| <i>Hunnivirus</i>   | Hunnivirus Rat-C3 | KT944200.1    | <i>Bandicota indica</i>       | VietNam | 2012 |
| <i>Hunnivirus</i>   | Hunnivirus Rat-C3 | KT944199.1    | <i>Bandicota indica</i>       | VietNam | 2012 |
| <i>Hunnivirus</i>   | Hunnivirus Rat-C4 | KT944211.1    | <i>Rattus norvegicus</i>      | VietNam | 2014 |
| <i>Hunnivirus</i>   | Hunnivirus Rat-C4 | KT944204.1    | <i>Rattus norvegicus</i>      | VietNam | 2013 |
| <i>Hunnivirus</i>   | Hunnivirus Rat-C4 | KT944210.1    | <i>Rattus norvegicus</i>      | USA     | 2012 |
| <i>Hunnivirus</i>   | Hunnivirus Rat-C4 | MW417242.1    | <i>Rattus norvegicus</i>      | China   | 2017 |
| <i>Hunnivirus</i>   | Hunnivirus Rat-C5 | 22084x6-2255  | <i>Rattus argentiventer</i>   | VietNam | 2014 |
| <i>Hunnivirus</i>   | Hunnivirus Rat-C5 | 22084x1-8350  | <i>Rattus argentiventer</i>   | VietNam | 2014 |
| <i>Hunnivirus</i>   | Hunnivirus Rat-C5 | 22054x5-16    | <i>Rattus argentiventer</i>   | VietNam | 2013 |
| <i>Hunnivirus</i>   | Hunnivirus Rat-C5 | 22084x1-20374 | <i>Rattus argentiventer</i>   | VietNam | 2014 |
| <i>Hunnivirus</i>   | Hunnivirus Rat-C5 | 22084x7-1893  | <i>Rattus argentiventer</i>   | VietNam | 2014 |
| <i>Hunnivirus</i>   | HuV-A6            | MF352413.1    | <i>Niviventer confucianus</i> | China   | 2012 |
| <i>Hunnivirus</i>   | HuV-A6            | KX156157.1    | <i>Rodentia</i>               | China   | 2015 |
| <i>Hunnivirus</i>   | Hunnivirus Rat-C6 | 16715x18-31   | <i>Rattus argentiventer</i>   | VietNam | 2014 |
| <i>Hunnivirus</i>   | Hunnivirus Rat-C6 | 22084x8-313   | <i>Rattus argentiventer</i>   | VietNam | 2014 |
| <i>Hunnivirus</i>   | Feline-hunnivirus | MF953886.2    | <i>Felis catus</i>            | China   | 2017 |
| <i>Hunnivirus</i>   | HuV-A1            | NC_018668.1   | <i>Bos taurus</i>             | Hungary | 2008 |
| <i>Hunnivirus</i>   | HuV-A2            | HM153767.3    | <i>Ovis aries</i>             | Hungary | 2009 |
| <i>Hunnivirus</i>   | HuV-A9            | KY432925.1    | <i>Rodentia</i>               | China   | 2014 |
| <i>Parechovirus</i> | Parechovirus-A1   | 17668x95-27   | <i>Homo sapiens</i>           | VietNam | 2014 |
| <i>Parechovirus</i> | Parechovirus-A1   | 19379x8-30    | <i>Homo sapiens</i>           | VietNam | 2015 |
| <i>Parechovirus</i> | Parechovirus-A1   | 16020x15-8    | <i>Homo sapiens</i>           | VietNam | 2013 |
| <i>Parechovirus</i> | Parechovirus-A1   | 16020x48-5    | <i>Homo sapiens</i>           | VietNam | 2013 |
| <i>Parechovirus</i> | Parechovirus-A1   | 16845x17-2    | <i>Homo sapiens</i>           | VietNam | 2014 |
| <i>Parechovirus</i> | Parechovirus-A1   | 19345x64-26   | <i>Homo sapiens</i>           | VietNam | 2015 |
| <i>Parechovirus</i> | Parechovirus-A1   | 17668x89-6    | <i>Homo sapiens</i>           | VietNam | 2014 |
| <i>Parechovirus</i> | Parechovirus-A1   | 19379x12-12   | <i>Homo sapiens</i>           | VietNam | 2015 |
| <i>Parechovirus</i> | Parechovirus-A1   | 19345x23-2    | <i>Homo sapiens</i>           | VietNam | 2015 |
| <i>Parechovirus</i> | Parechovirus-A1   | 16806x40-58   | <i>Homo sapiens</i>           | VietNam | 2014 |
| <i>Parechovirus</i> | Parechovirus-A1   | 16370x63-9    | <i>Homo sapiens</i>           | VietNam | 2013 |
| <i>Parechovirus</i> | Parechovirus-A1   | 19345x31-1    | <i>Homo sapiens</i>           | VietNam | 2015 |
| <i>Parechovirus</i> | Parechovirus-A1   | 16806x70-48   | <i>Homo sapiens</i>           | VietNam | 2014 |
| <i>Parechovirus</i> | Parechovirus-A1   | 19379x62-27   | <i>Homo sapiens</i>           | VietNam | 2014 |
| <i>Parechovirus</i> | Parechovirus-A1   | 16370x52-4    | <i>Homo sapiens</i>           | VietNam | 2013 |



|                     |                     |              |                                |         |      |
|---------------------|---------------------|--------------|--------------------------------|---------|------|
| <i>Parechovirus</i> | Parechovirus-A1     | L02971       | <i>Homo sapiens</i>            | USA     | 1992 |
| <i>Parechovirus</i> | Parechovirus-A1     | 16318x54-27  | <i>Homo sapiens</i>            | VietNam | 2014 |
| <i>Parechovirus</i> | Parechovirus-A1     | 16370x64-9   | <i>Homo sapiens</i>            | VietNam | 2013 |
| <i>Parechovirus</i> | Parechovirus-A1     | 16806x9-1    | <i>Homo sapiens</i>            | VietNam | 2013 |
| <i>Parechovirus</i> | Parechovirus-A1     | 19344x62-6   | <i>Homo sapiens</i>            | VietNam | 2014 |
| <i>Parechovirus</i> | Parechovirus-A1     | 19379x60-27  | <i>Homo sapiens</i>            | VietNam | 2015 |
| <i>Parechovirus</i> | Parechovirus-A1     | 16806x76-33  | <i>Homo sapiens</i>            | VietNam | 2014 |
| <i>Parechovirus</i> | Parechovirus-A1     | 16317x75-2   | <i>Homo sapiens</i>            | VietNam | 2014 |
| <i>Parechovirus</i> | Parechovirus-A1     | 16806x82-189 | <i>Homo sapiens</i>            | VietNam | 2013 |
| <i>Parechovirus</i> | Parechovirus-A1     | 16845x1-6    | <i>Homo sapiens</i>            | VietNam | 2014 |
| <i>Parechovirus</i> | Parechovirus-A1     | 16806x27-1   | <i>Homo sapiens</i>            | VietNam | 2014 |
| <i>Parechovirus</i> | Parechovirus-C1     | HF677705     | <i>Apodemus sylvaticus</i>     | Botambi | 1972 |
| <i>Parechovirus</i> | VZ-Rat              | 22057x67-9   | <i>Rattus argentiventer</i>    | VietNam | 2014 |
| <i>Parechovirus</i> | Parechovirus-E1     | KY645497     | <i>Falco vespertinus</i>       | Hungary | 2014 |
| <i>Parechovirus</i> | Parechovirus-B1     | AF327920     | <i>Clethrionomys glareolus</i> | Sweden  | 1995 |
| <i>Parechovirus</i> | Parechovirus Bat-C1 | 16715x38-55  | <i>Scotophilus kuhlii</i>      | VietNam | 2014 |
| <i>Parechovirus</i> | Parechovirus Bat-C1 | 17819x13-28  | <i>Scotophilus kuhlii</i>      | VietNam | 2014 |
| <i>Parechovirus</i> | Parechovirus Bat-C1 | 16715x40-76  | <i>Scotophilus kuhlii</i>      | VietNam | 2014 |
| <i>Parechovirus</i> | Parechovirus Bat-C1 | 16715x24-56  | <i>Scotophilus kuhlii</i>      | VietNam | 2014 |
| <i>Parechovirus</i> | Parechovirus Bat-C1 | 17819x45-5   | <i>Scotophilus kuhlii</i>      | VietNam | 2014 |
| <i>Parechovirus</i> | Parechovirus Bat-C1 | 16715x86-78  | Unknown bat                    | VietNam | 2014 |
| <i>Parechovirus</i> | Parechovirus Bat-C1 | 16715x78-129 | <i>Scotophilus kuhlii</i>      | VietNam | 2014 |
| <i>Parechovirus</i> | Parechovirus Bat-C1 | 16715x14-80  | <i>Scotophilus kuhlii</i>      | VietNam | 2014 |
| <i>Parechovirus</i> | Parechovirus Bat-C1 | 16845x63-120 | <i>Scotophilus kuhlii</i>      | VietNam | 2014 |
| <i>Parechovirus</i> | Parechovirus Bat-C1 | 16715x78-130 | <i>Scotophilus kuhlii</i>      | VietNam | 2014 |
| <i>Parechovirus</i> | Parechovirus Bat-C1 | 16845x31-17  | <i>Scotophilus kuhlii</i>      | VietNam | 2014 |
| <i>Parechovirus</i> | Parechovirus Bat-C1 | 16715x39-32  | <i>Scotophilus kuhlii</i>      | VietNam | 2014 |
| <i>Parechovirus</i> | Parechovirus Bat-C1 | 20724x87-644 | <i>Scotophilus kuhlii</i>      | VietNam | 2015 |
| <i>Parechovirus</i> | Parechovirus Bat-C2 | 17819x11-22  | <i>Scotophilus kuhlii</i>      | VietNam | 2014 |
| <i>Parechovirus</i> | Parechovirus Bat-C2 | 17819x16-21  | <i>Scotophilus kuhlii</i>      | VietNam | 2014 |
| <i>Parechovirus</i> | Parechovirus Bat-C2 | 16715x13-17  | Unknown bat                    | VietNam | 2014 |
| <i>Parechovirus</i> | Parechovirus Bat-C2 | 16845x8-27   | <i>Scotophilus kuhlii</i>      | VietNam | 2014 |
| <i>Parechovirus</i> | Parechovirus Bat-C2 | 20745x5-108  | <i>Scotophilus kuhlii</i>      | VietNam | 2015 |
| <i>Parechovirus</i> | Parechovirus Bat-C3 | 17819x48-10  | <i>Scotophilus kuhlii</i>      | VietNam | 2014 |
| <i>Parechovirus</i> | Parechovirus Bat-C3 | 16845x70-18  | <i>Scotophilus kuhlii</i>      | VietNam | 2014 |
| <i>Parechovirus</i> | Parechovirus Bat-C3 | 20745x18-15  | <i>Scotophilus kuhlii</i>      | VietNam | 2015 |
| <i>Parechovirus</i> | Parechovirus Bat-C3 | 20724x80-30  | <i>Scotophilus kuhlii</i>      | VietNam | 2015 |
| <i>Parechovirus</i> | Parechovirus Bat-C3 | 17819x11-28  | <i>Scotophilus kuhlii</i>      | VietNam | 2014 |



|                     |                         |              |                                  |             |      |
|---------------------|-------------------------|--------------|----------------------------------|-------------|------|
| <i>Parechovirus</i> | Parechovirus Bat-C3     | 20745x25-316 | <i>Scotophilus kuhlii</i>        | VietNam     | 2015 |
| <i>Parechovirus</i> | Parechovirus Bat-C3     | 16715x40-44  | <i>Scotophilus kuhlii</i>        | VietNam     | 2014 |
| <i>Parechovirus</i> | Parechovirus Bat-C3     | 16715x86-30  | <i>Unknown bat</i>               | VietNam     | 2014 |
| <i>Parechovirus</i> | Parechovirus Bat-C3     | 17819x20-34  | <i>Scotophilus kuhlii</i>        | VietNam     | 2014 |
| <i>Parechovirus</i> | Parechovirus-D1         | KF006989     | <i>Mustela putorius furo</i>     | Netherlands | 2013 |
| <i>Parechovirus</i> | Parechovirus-D          | IMK348056.1  | <i>Pipistrellus pipistrellus</i> | China       | 2016 |
| <i>Parechovirus</i> | Parechovirus-F1         | MG600084     | <i>Teratoscincus roborowski</i>  | China       | 2015 |
| <i>Cardiovirus</i>  | cardiovirus-D1          | 16020x71-3   | <i>Homo sapiens</i>              | VietNam     | 2013 |
| <i>Cardiovirus</i>  | cardiovirus-D1          | EF165067     | <i>homo sapiens</i>              | USA         | 1981 |
| <i>Cardiovirus</i>  | cardiovirus-B1          | JX443418     | <i>Mus musculus</i>              | USA         | 1952 |
| <i>Cardiovirus</i>  | cardiovirus-B2          | M94868       | <i>homo sapiens</i>              | Russia      | 1955 |
| <i>Cardiovirus</i>  | cardiovirus-E1          | KY432930     | <i>Myodes andersoni</i>          | China       | 2014 |
| <i>Cardiovirus</i>  | marmot-cardiovirus      | KY855434     | <i>Marmota himalayana</i>        | China       | 2013 |
| <i>Cardiovirus</i>  | genet-fecal-theilovirus | KF823815     | <i>Genetta genetta</i>           | Spain       | 2012 |
| <i>Cardiovirus</i>  | cardiovirus-C1          | JQ864242     | <i>Rattus norvegicus</i>         | USA         | 2010 |
| <i>Cardiovirus</i>  | cardiovirus-C2          | JX683808     | <i>Rattus norvegicus</i>         | USA         | 2012 |
| <i>Cardiovirus</i>  | cardiovirus-C3          | MF352424     | <i>Rattus norvegicus</i>         | China       | 2012 |
| <i>Cardiovirus</i>  | Cardiovirus Rat-C3      | 16715x57-28  | <i>Rattus argentiventer</i>      | VietNam     | 2014 |
| <i>Cardiovirus</i>  | Cardiovirus Rat-C3      | 16715x33-171 | <i>Rattus argentiventer</i>      | VietNam     | 2014 |
| <i>Cardiovirus</i>  | Cardiovirus Rat-C2      | 22084x1-3992 | <i>Rattus argentiventer</i>      | VietNam     | 2014 |
| <i>Cardiovirus</i>  | Cardiovirus Rat-C1      | 22084x5-1820 | <i>Rattus argentiventer</i>      | VietNam     | 2014 |
| <i>Cardiovirus</i>  | Cardiovirus Rat-C1      | 22084x8-300  | <i>Rattus argentiventer</i>      | VietNam     | 2014 |
| <i>Cardiovirus</i>  | Cardiovirus Rat-C1      | 22084x1-3987 | <i>Rattus argentiventer</i>      | VietNam     | 2014 |
| <i>Cardiovirus</i>  | Cardiovirus Rat-C1      | KT944132.1   | <i>Bandicota indica</i>          | VietNam     | 2012 |
| <i>Cardiovirus</i>  | Cardiovirus Rat-C1      | KT944133.1   | <i>Rattus argentiventer</i>      | VietNam     | 2012 |
| <i>Cardiovirus</i>  | Cardiovirus Rat-C1      | 16715x33-215 | <i>Rattus argentiventer</i>      | VietNam     | 2014 |
| <i>Cardiovirus</i>  | cardiovirus-A1          | M81861       | <i>Rattus norvegicus</i>         | NA          | 1992 |
| <i>Cardiovirus</i>  | cardiovirus-A2          | JX257003     | <i>Apodemus sylvaticus</i>       | Germany     | 2005 |
| <i>Cardiovirus</i>  | cardiovirus-F1          | KY432929     | <i>Myodes andersoni</i>          | China       | 2014 |
| <i>Mupivirus</i>    | Mupivirus Rat-C1        | 22057x86-7   | <i>Rattus argentiventer</i>      | VietNam     | 2014 |
| <i>Mupivirus</i>    | Mupivirus Rat-C1        | 16715x73-23  | <i>Rattus argentiventer</i>      | VietNam     | 2014 |
| <i>Mupivirus</i>    | Mupivirus Rat-C1        | 16715x10-93  | <i>Rattus argentiventer</i>      | VietNam     | 2014 |
| <i>Mupivirus</i>    | Mupivirus Rat-C1        | 22056x85-3   | <i>Rattus losea</i>              | VietNam     | 2014 |
| <i>Mupivirus</i>    | Mupivirus Rat-C1        | 22084x13-82  | <i>Rattus argentiventer</i>      | VietNam     | 2014 |
| <i>Mupivirus</i>    | mupivirus-A2            | KY432934.1   | <i>Niventer confucianus</i>      | China       | 2015 |
| <i>Mupivirus</i>    | mupivirus-A1            | KY432924.1   | <i>Mus caroli</i>                | China       | 2014 |
| <i>Mosavirus</i>    | Mosavirus Rat-C1        | 22084x10-70  | <i>Rattus argentiventer</i>      | VietNam     | 2014 |



|                     |                      |              |                             |         |      |
|---------------------|----------------------|--------------|-----------------------------|---------|------|
| <i>Mosavirus</i>    | Mosavirus Rat-C1     | 22084x1-1109 | <i>Rattus argentiventer</i> | VietNam | 2014 |
| <i>Mosavirus</i>    | Mosavirus Rat-C1     | 22084x6-985  | <i>Rattus argentiventer</i> | VietNam | 2014 |
| <i>Mosavirus</i>    | Mosavirus Rat-C1     | 22084x7-1073 | <i>Rattus argentiventer</i> | VietNam | 2014 |
| <i>Mosavirus</i>    | MoV-A1               | JF973687.1   | <i>Peromyscus crinitus</i>  | USA     | 2010 |
| <i>Mosavirus</i>    | MoV-A2               | KF958461.1   | <i>Coracias garrulus</i>    | Hungary | 2011 |
| <i>Mosavirus</i>    | MoV-B1               | KY855435.1   | <i>Marmota himalayana</i>   | China   | 2013 |
| <i>Unclassified</i> | Unclassified Bat-C1  | 16715x40-55  | <i>Scotophilus_kuhlui</i>   | VietNam | 2014 |
| <i>Unclassified</i> | Unclassified Bat-C1  | 16845x14-8   | <i>Scotophilus_kuhlui</i>   | VietNam | 2014 |
| <i>Unclassified</i> | Unclassified Bat-C1  | 20745x7-311  | <i>Scotophilus_kuhlui</i>   | VietNam | 2015 |
| <i>Unclassified</i> | Unclassified Bat-C1  | 16845x77-12  | <i>Scotophilus_kuhlui</i>   | VietNam | 2014 |
| <i>Unclassified</i> | Unclassified Bat-C1  | 16845x22-8   | <i>Scotophilus_kuhlui</i>   | VietNam | 2014 |
| <i>Unclassified</i> | Unclassified Bat-C1  | 16845x56-22  | <i>Scotophilus_kuhlui</i>   | VietNam | 2014 |
| <i>Unclassified</i> | Unclassified Bat-C1  | 20745x13-25  | <i>Scotophilus_kuhlui</i>   | VietNam | 2015 |
| <i>Unclassified</i> | Unclassified Bat-C1  | 16715x14-68  | <i>Scotophilus_kuhlui</i>   | VietNam | 2014 |
| <i>Unclassified</i> | Unclassified Bat-C1  | 16845x64-33  | <i>Scotophilus_kuhlui</i>   | VietNam | 2014 |
| <i>Unclassified</i> | Unclassified Bat-C1  | 16715x40-52  | <i>Scotophilus_kuhlui</i>   | VietNam | 2014 |
| <i>Unclassified</i> | Unclassified Bat-C1  | 16715x54-52  | <i>Scotophilus_kuhlui</i>   | VietNam | 2014 |
| <i>Unclassified</i> | Unclassified Bat-C1  | 16715x45-12  | <i>Scotophilus_kuhlui</i>   | VietNam | 2014 |
| <i>Unclassified</i> | Unclassified Bat-C1  | 16715x38-16  | <i>Scotophilus_kuhlui</i>   | VietNam | 2014 |
| <i>Unclassified</i> | Unclassified Bat-C1  | 16715x55-49  | <i>Unknown bat</i>          | VietNam | 2014 |
| <i>Unclassified</i> | Unclassified Bat-C1  | 16715x71-53  | <i>Scotophilus_kuhlui</i>   | VietNam | 2014 |
| <i>Unclassified</i> | Unclassified Bat-C1  | 16845x40-27  | <i>Scotophilus_kuhlui</i>   | VietNam | 2014 |
| <i>Unclassified</i> | Ia-io-picornavirus-1 | JQ814852.1   | <i>Unknown bat</i>          | China   | 2010 |
